# Supplementary material
Source: PubMed Central journal article supplement (PMC5093042)

A

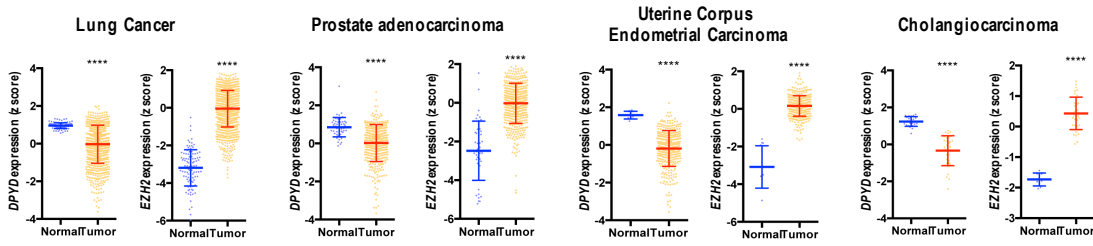

B

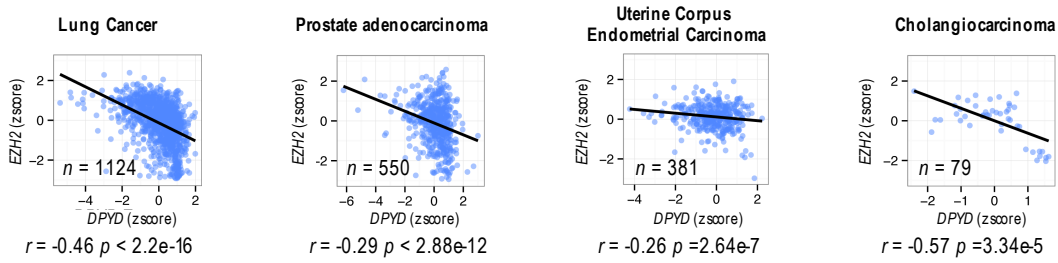

C

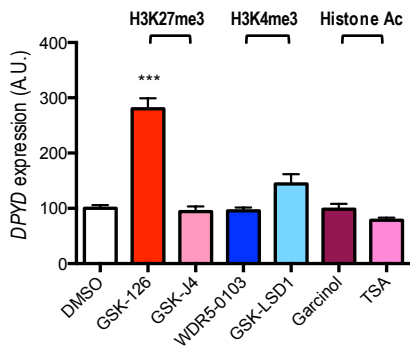

D

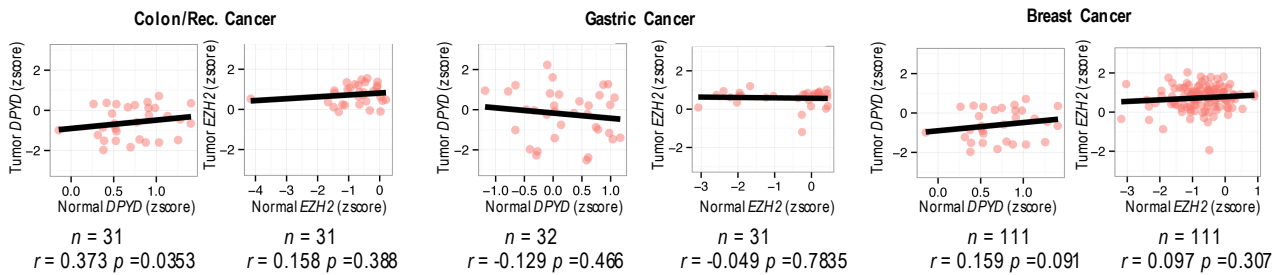

Figure. S2

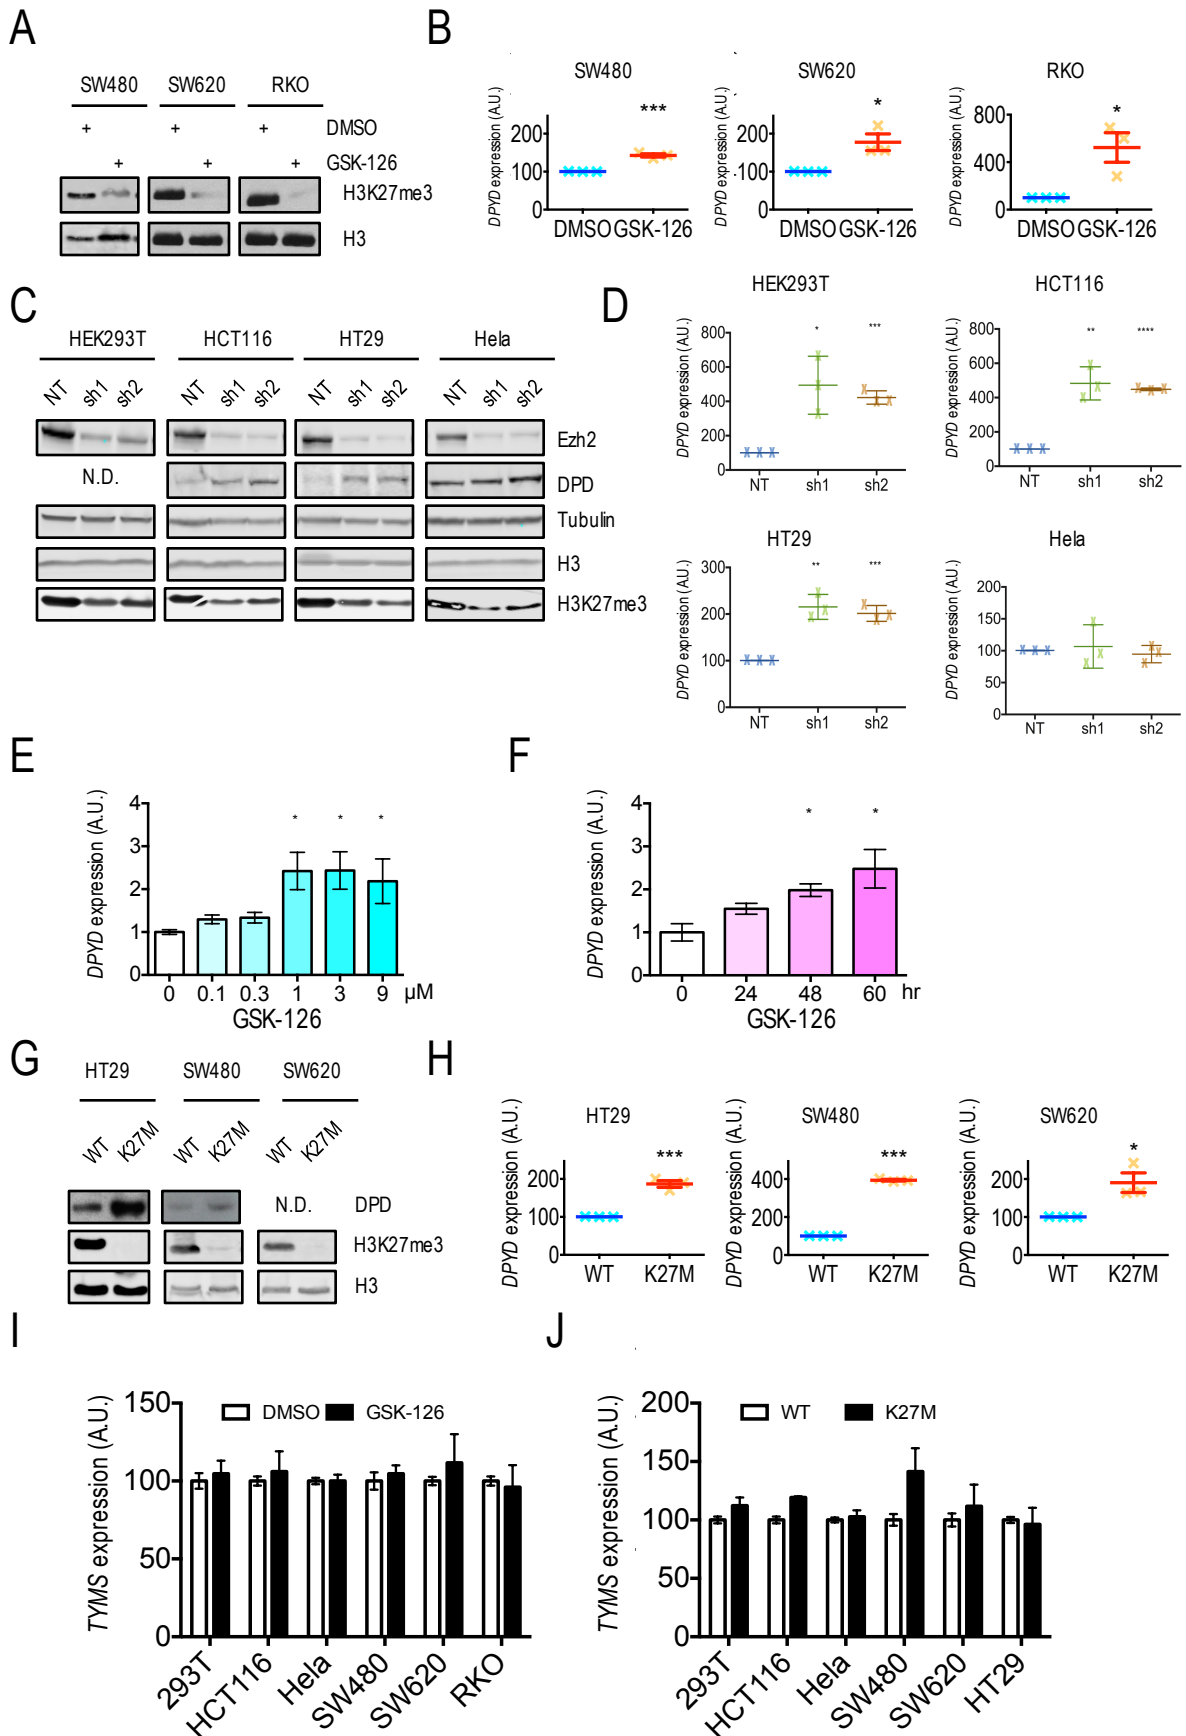

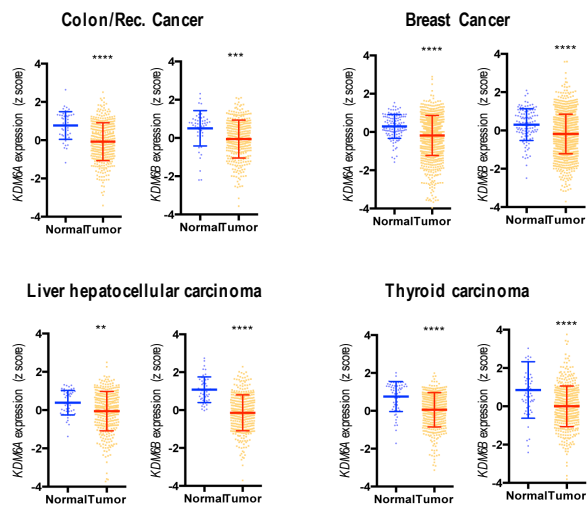

Figure. S4

A

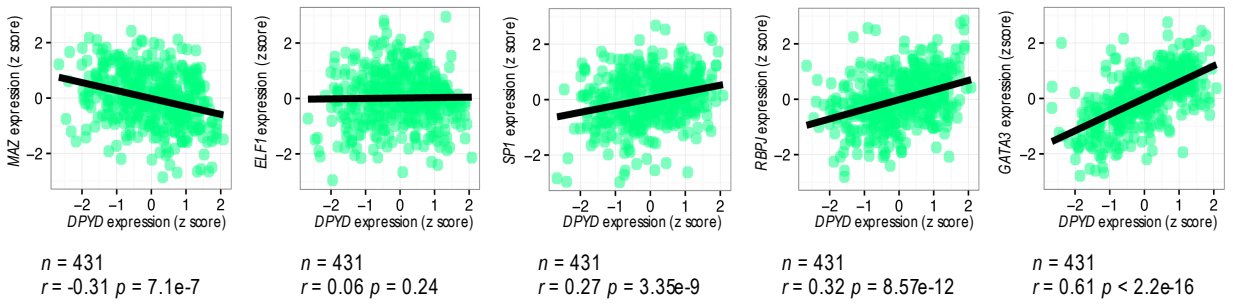

B

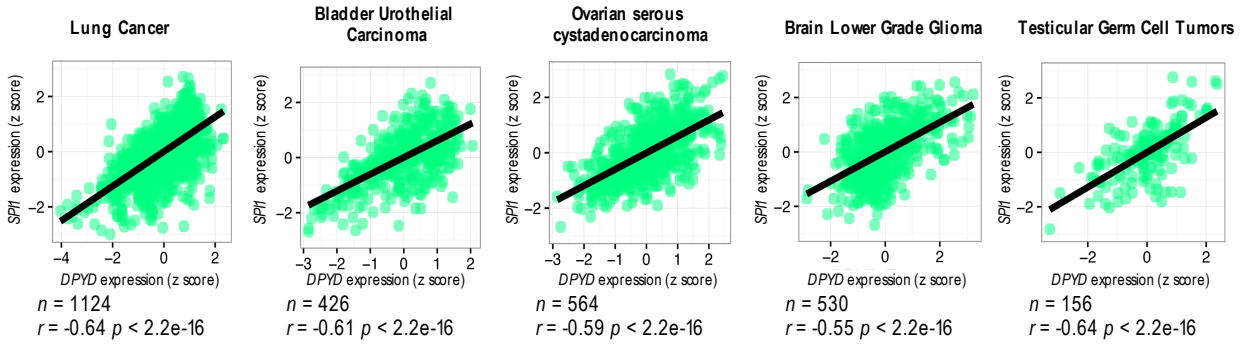

C

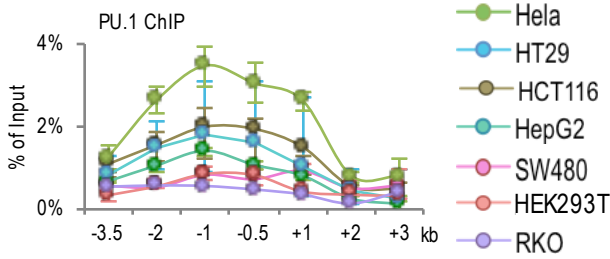



Figure. S6

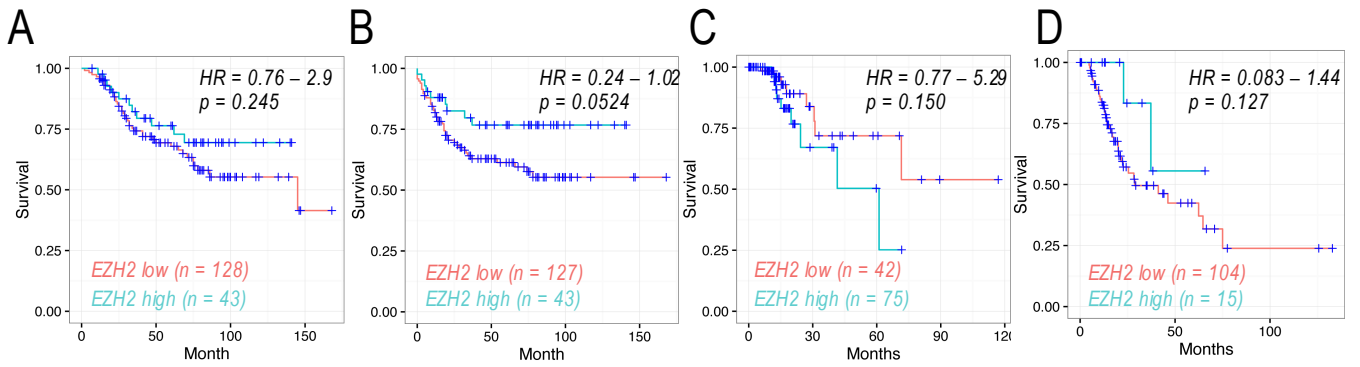

Supplement: NIHMS814503-supplement-3.pdf [file NIHMS814503-supplement-3.pdf]
